# Supplementary material for: Predictions of the Biological Effects of Several Acyclic Monoterpenes as Chemical Constituents of Essential Oils Extracted from Plants
Source: MDPI journal article supplement (doi:10.3390/molecules28124640), 2023-06-08
Supplement: s1 [file s1]

# Predictions of the Biological Effects of Several Acyclic Monoterpenes as Chemical Constituents of Essential Oils Extracted from Plants

Daniela Dascalu <sup>1,2,†</sup>, Adriana Isvoran <sup>1,2,†</sup> and Nicoleta Ianovici <sup>1,3,\*</sup>

<sup>1</sup> Department of Biology Chemistry, West University of Timisoara, 16 Pestalozzi, 300115 Timisoara, Romania; daniela.dascalu@e-uvr.ro (D.D.); adriana.isvoran@e-uvr.ro (A.I.)

<sup>2</sup> Advanced Environmental Research Laboratories, West University of Timisoara, 4 Oituz, 300086 Timisoara, Romania

<sup>3</sup> Environmental Biology and Biomonitoring Research Center, West University of Timisoara, 16 Pestalozzi, 300115 Timisoara, Romania

\* Correspondence: nicoleta.ianovici@e-uvr.ro

† These authors contributed equally to this work.

**Table S1.** SMILES formulas and physicochemical properties of the acyclic monoterpenes considered in the present study.

| Common name         | SMILES formula                         | MW (g/mol) | logP | HBD | HBA | RB | tPSA (Å <sup>2</sup> ) |
|---------------------|----------------------------------------|------------|------|-----|-----|----|------------------------|
| beta-ocimene        | <chem>CC(=CC/C=C(/C)\C=C)C</chem>      | 136.23     | 4.3  | 0   | 0   | 3  | 0.00                   |
| beta-myrcene        | <chem>CC(=CCCC(=C)C=C)C</chem>         | 136.23     | 4.3  | 0   | 0   | 4  | 0.00                   |
| geranial (citral)   | <chem>CC(=CCC/C(=C/C=O)/C)C</chem>     | 152.23     | 3.0  | 0   | 1   | 4  | 17.1                   |
| citronellal         | <chem>CC(CCC=C(C)C)CC=O</chem>         | 154.25     | 3.0  | 0   | 1   | 5  | 17.1                   |
| geraniol            | <chem>CC(=CCCC(=CCO)C)C</chem>         | 154.25     | 2.9  | 1   | 1   | 4  | 20.2                   |
| linalool            | <chem>CC(=CCCC(C)(C=C)O)C</chem>       | 154.25     | 2.7  | 1   | 1   | 4  | 20.2                   |
| citronellol         | <chem>CC(CCC=C(C)C)CCO</chem>          | 156.26     | 3.2  | 1   | 1   | 5  | 22.2                   |
| linalyl acetate     | <chem>CC(=CCCC(C)(C=C)OC(=O)C)C</chem> | 196.99     | 3.3  | 0   | 2   | 6  | 26.3                   |
| citronellyl acetate | <chem>CC(CCC=C(C)C)CCOC(=O)C</chem>    | 198.30     | 3.8  | 0   | 2   | 7  | 26.3                   |

**Table S2.** ADMETlab2.0 outputs regarding the interactions of acyclic monoterpenes with human cytochromes strongly involved in metabolism of xenobiotics.

| Compound/<br>activity | inhibitor |         |        |        |        | substrate |         |        |        |        |
|-----------------------|-----------|---------|--------|--------|--------|-----------|---------|--------|--------|--------|
|                       | CYP1A2    | CYP2C19 | CYP2C9 | CYP2D6 | CYP3A4 | CYP1A2    | CYP2C19 | CYP2C9 | CYP2D6 | CYP3A4 |
| beta-ocimene          | 0.902     | 0.460   | 0.097  | 0.080  | 0.124  | 0.248     | 0.806   | 0.104  | 0.147  | 0.279  |
| beta-myrcene          | 0.785     | 0.176   | 0.073  | 0.015  | 0.032  | 0.243     | 0.803   | 0.719  | 0.519  | 0.261  |
| geranial (citral)     | 0.781     | 0.346   | 0.067  | 0.044  | 0.020  | 0.639     | 0.867   | 0.902  | 0.590  | 0.226  |
| citronellal           | 0.578     | 0.116   | 0.037  | 0.049  | 0.033  | 0.406     | 0.669   | 0.728  | 0.269  | 0.188  |
| geraniol              | 0.490     | 0.079   | 0.034  | 0.048  | 0.024  | 0.263     | 0.410   | 0.695  | 0.168  | 0.214  |

|                     |       |       |       |       |       |       |       |       |       |       |
|---------------------|-------|-------|-------|-------|-------|-------|-------|-------|-------|-------|
| linalool            | 0.163 | 0.242 | 0.042 | 0.050 | 0.300 | 0.281 | 0.832 | 0.768 | 0.112 | 0.285 |
| citronellol         | 0.650 | 0.092 | 0.052 | 0.007 | 0.018 | 0.427 | 0.604 | 0.765 | 0.115 | 0.162 |
| linalyl acetate     | 0.258 | 0.161 | 0.038 | 0.091 | 0.398 | 0.161 | 0.842 | 0.196 | 0.113 | 0.314 |
| citronellyl acetate | 0.966 | 0.449 | 0.282 | 0.029 | 0.069 | 0.151 | 0.531 | 0.541 | 0.110 | 0.221 |

**Table S3.** Probabilities that the investigated acyclic monoterpenes to affect the nuclear receptors: AR—androgen receptor, ER—estrogen receptor, PPAR-gamma—peroxisome proliferator-activated receptor gamma.

| Compound/ Effects on the nuclear receptors | AR    | ER    | PPAR-gamma |
|--------------------------------------------|-------|-------|------------|
| beta-ocimene                               | 0.006 | 0.060 | 0.423      |
| beta-myrcene                               | 0.012 | 0.082 | 0.112      |
| geranial (citral)                          | 0.012 | 0.081 | 0.007      |
| citronellal                                | 0.005 | 0.140 | 0.004      |
| geraniol                                   | 0.003 | 0.072 | 0.003      |
| linalool                                   | 0.006 | 0.112 | 0.003      |
| citronellol                                | 0.006 | 0.114 | 0.003      |
| linalyl acetate                            | 0.012 | 0.074 | 0.005      |
| citronellyl acetate                        | 0.017 | 0.074 | 0.002      |

**Table S4.** Predictions Skin sensitization potential of the investigated acyclic monoterpenes: DPRA—direct peptide reactivity assay, KeratinoSens—a method using immortalised adherent cell line derived from human keratinocytes; H-CLAT—human Cell Line Activation Test; LLNA—Local Lymph Node Assay data; HRIPT/HMT—Human Repeated Insult Patch Test (HRIPT) and Human Maximization Test (HMT); AD—applicability domain of the model.

| Compound     | DPRA                                        | KeratinoSens                                | h-CLAT                                     | LLNA in vivo                                    | HRIPT/HMT                                   | Baesian outcome |
|--------------|---------------------------------------------|---------------------------------------------|--------------------------------------------|-------------------------------------------------|---------------------------------------------|-----------------|
| beta-ocimene | Sensitizer (Outside AD, Confiability 88.3%) | Sensitizer (Outside AD, Confiability 92.4%) | Sensitizer (Inside AD, Confiability 60.6%) | Non-Sensitizer (Outside AD, Confiability 97.9%) | Sensitizer (Outside AD, Confiability 96.2%) | Sensitizer      |
| beta-myrcene | Sensitizer (Outside AD,                     | Sensitizer (Outside AD,                     | Sensitizer                                 | Non-Sensitizer                                  | Sensitizer                                  | Sensitizer      |

|                        |                                                             |                                                             |                                                     |                                                          |                                                             |                    |
|------------------------|-------------------------------------------------------------|-------------------------------------------------------------|-----------------------------------------------------|----------------------------------------------------------|-------------------------------------------------------------|--------------------|
|                        | Confiability<br>92.6%)                                      | Confiability<br>95.3%)                                      | (Inside AD,<br>Confiability<br>60.7%)               | (Outside AD,<br>Confiability<br>99.8%)                   | (Outside AD,<br>Confiability<br>99.1%)                      |                    |
| geranial<br>(citral)   | Sensitizer<br>(Inside AD,<br>Confiability<br>95.1%)         | Sensitizer<br>(Inside AD,<br>Confiability<br>99.2%)         | Sensitizer<br>(Inside AD,<br>Confiability<br>60.6%) | Non-Sensitizer<br>(Outside AD,<br>Confiability<br>99.9%) | Sensitizer<br>(Inside AD,<br>Confiability<br>99.5%)         | Sensitizer         |
| citronellal            | Sensitizer<br>(Inside AD,<br>Confiability<br>91.6%)         | Sensitizer<br>(Inside AD,<br>Confiability<br>91.9%)         | Sensitizer<br>(Inside AD,<br>Confiability<br>60.9%) | Sensitizer<br>(Outside AD,<br>Confiability<br>99.8%)     | Sensitizer<br>(Inside AD,<br>Confiability<br>99.3%)         | Sensitizer         |
| geraniol               | Non-<br>Sensitizer<br>(Inside AD,<br>Confiability<br>86.6%) | Sensitizer<br>(Inside AD,<br>Confiability<br>97.5%)         | Sensitizer<br>(Inside AD,<br>Confiability<br>58.9%) | Sensitizer<br>(Outside AD,<br>Confiability<br>99.9%)     | Sensitizer<br>(Inside AD,<br>Confiability<br>78.5%)         | Sensitizer         |
| linalool               | Non-<br>Sensitizer<br>(Inside AD,<br>Confiability<br>90.1%) | Non-<br>Sensitizer<br>(Inside AD,<br>Confiability<br>90.6%) | Sensitizer<br>(Inside AD,<br>Confiability<br>59.7%) | Non-Sensitizer<br>(Outside AD,<br>Confiability<br>98.5%) | Sensitizer<br>(Inside AD,<br>Confiability<br>99.6%)         | Sensitizer         |
| citronellol            | Sensitizer<br>(Inside AD,<br>Confiability<br>90.1%)         | Non-<br>Sensitizer<br>(Inside AD,<br>Confiability<br>93.7%) | Sensitizer<br>(Inside AD,<br>Confiability<br>59.2%) | Non-Sensitizer<br>(Outside AD,<br>Confiability<br>100%)  | Non-<br>Sensitizer<br>Inside AD,<br>Confiability<br>93.1%)  | Non-<br>Sensitizer |
| citronellyl<br>acetate | Sensitizer<br>(Inside AD,<br>Confiability<br>94.0%)         | Non-<br>Sensitizer<br>(Inside AD,<br>Confiability<br>56.1%) | Sensitizer<br>(Inside AD,<br>Confiability<br>60.0%) | Non-Sensitizer<br>(Outside AD,<br>Confiability<br>99.8%) | Non-<br>Sensitizer<br>(Inside AD,<br>Confiability<br>80.8%) | Non-<br>Sensitizer |
| linalyl acetate        | Sensitizer<br>(Inside AD,<br>Confiability<br>91.4%)         | Non-<br>Sensitizer<br>(Inside AD,<br>Confiability<br>94.1%) | Sensitizer<br>(Inside AD,<br>Confiability<br>61.1%) | Sensitizer<br>(Outside AD,<br>Confiability<br>99.3%)     | Sensitizer<br>(Inside AD,<br>Confiability<br>99.1%)         | Sensitizer         |

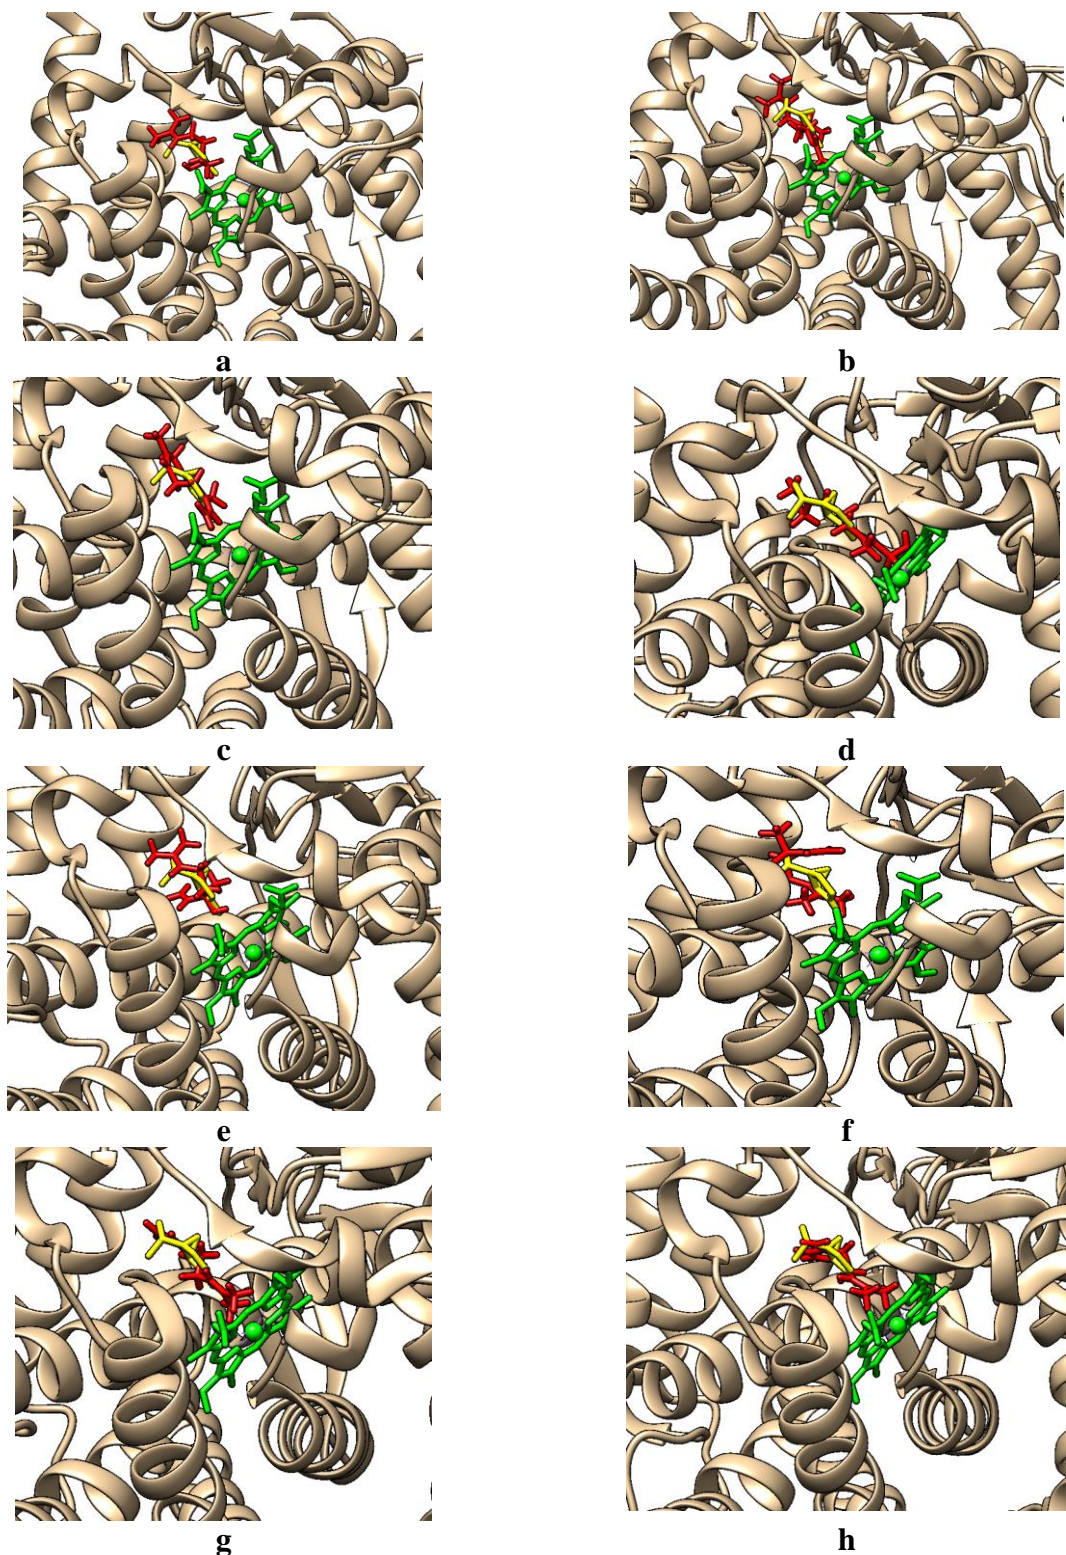

**Figure S1.** The binding poses of the acyclic monoterpenes to human CYP2B6: (a) citronellol, (b) citronellyl acetate, (c) geranial, (d) geraniol, (e) linalool, (f) linalyl acetate, (g) beta-myrcene, (h) beta-ocimene. The enzyme is revealed as brown ribbon, the acyclic monoterpenes are presented in red sticks, sabinene (the terpene that is found in the crystallographic structure of the enzyme) is revealed in yellow sticks and the prosthetic group hem in presented in green sticks.
